# Supplementary material for: The persimmon genome reveals clues to the evolution of a lineage-specific sex determination system in plants
Source: PLOS journal article supplement (doi:10.1371/journal.pgen.1008566), 2020-02-18

### S7 Figure: Physical relationships of the syntenic segments between the regions surrounding *MeGI* and *SiMeGI*

Syntenic relationships in the *MeGI* and *SiMeGI* surrounding regions, using GEvo (CoGe). The high-scoring segment pairs (HSP) detected are shown here connected with red lines. They correspond to gene pairs with *dS* values ranging between 0.5 and 0.9, or regions flanking genes, in the Dlo\_pri0025F and Dlo\_pri0799F genomic contigs.

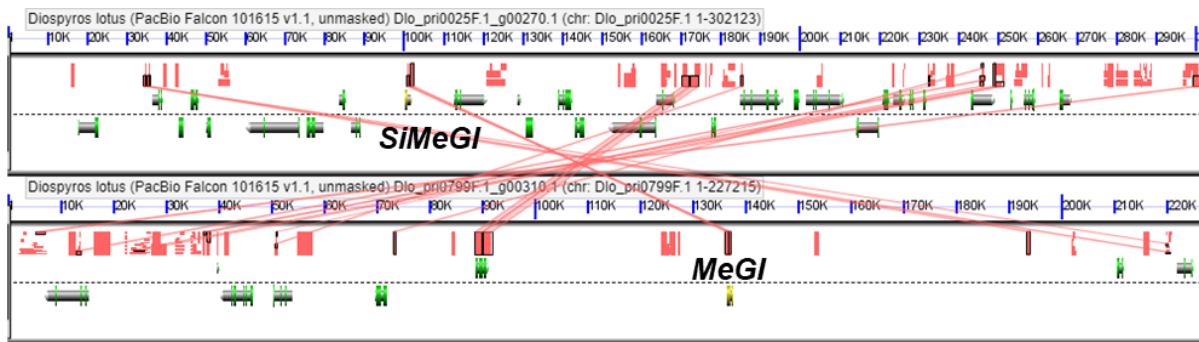

Supplement: S7 (10.1371/journal.pgen.1008566.s007) [file journal.pgen.1008566.s007]
