# Supplementary material for: The persimmon genome reveals clues to the evolution of a lineage-specific sex determination system in plants
Source: PLOS journal article supplement (doi:10.1371/journal.pgen.1008566), 2020-02-18

**S14 Figure: Syntenic analysis between the regions surrounding *OGI* and *MeGI*.**

Scaffold Dlo\_pri0799F.1, which includes *MeGI* on Chr. 13, and scaffold Dlo\_pri1021F.1, which includes *OGI* on Chr. 15, were aligned to each other to detect syntenic blocks. Both scaffolds are continuous and devoid of sequence gaps. Segmental collinearity was not detected between these regions, except for the transcriptional regions of *OGI* and *MeGI*.

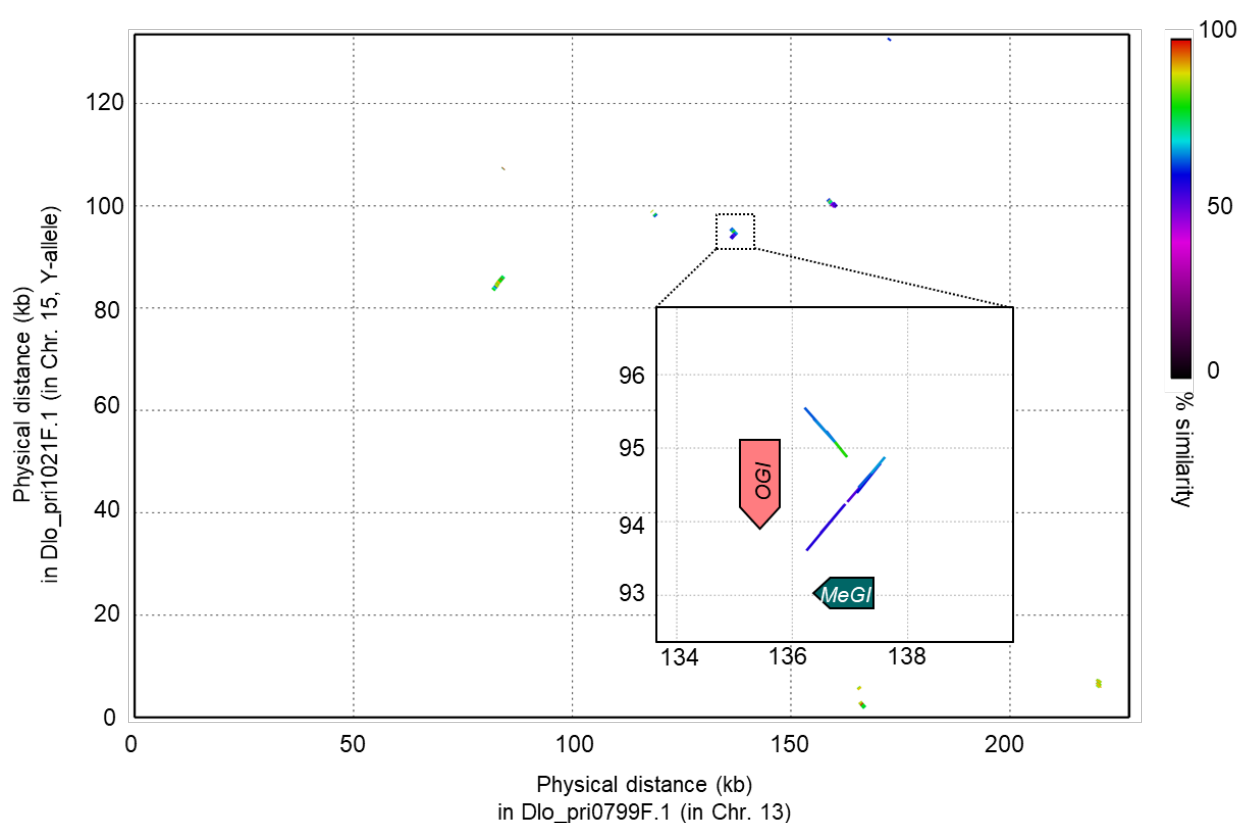

Supplement: S14 (10.1371/journal.pgen.1008566.s014) [file journal.pgen.1008566.s014]
